# Supplementary material for: Barcode System for Genetic Identification of Soybean [Glycine max (L.) Merrill] Cultivars Using InDel Markers Specific to Dense Variation Blocks
Source: PubMed Central journal article supplement (PMC5385371; doi:10.3389/fpls.2017.00520), 2017-04-10
Supplement: DataSheet1.pdf [file DataSheet1.pdf]

# Gm01

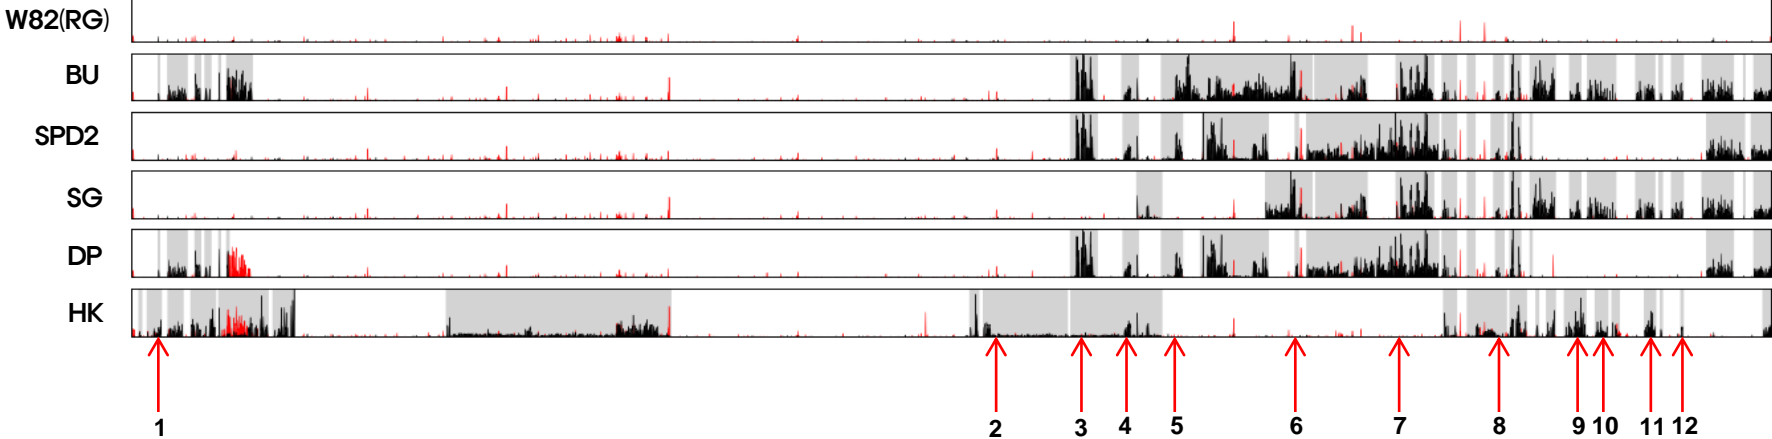

# Gm02

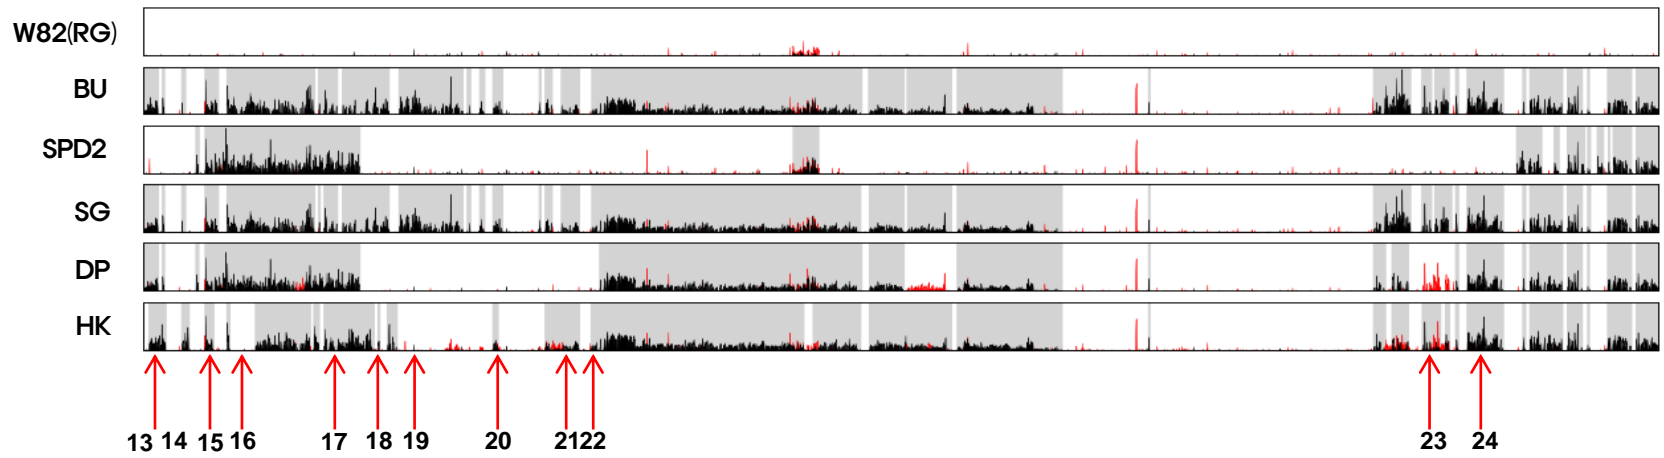

Figure S1. (Continued)

# Gm03

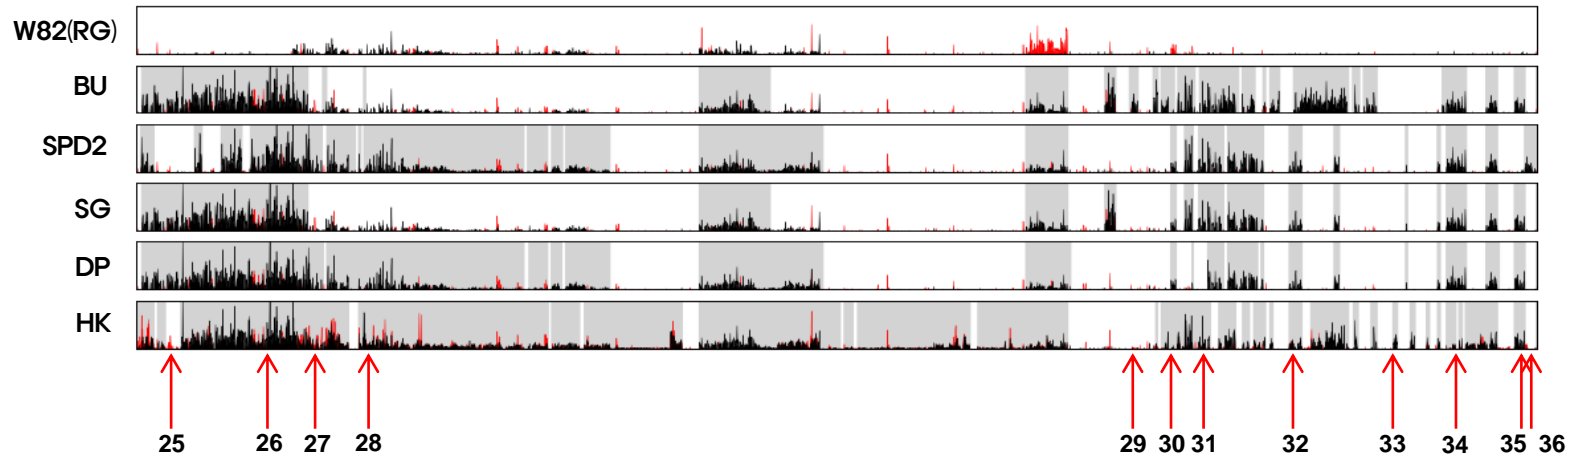

Figure S1. (Continued)

# Gm04

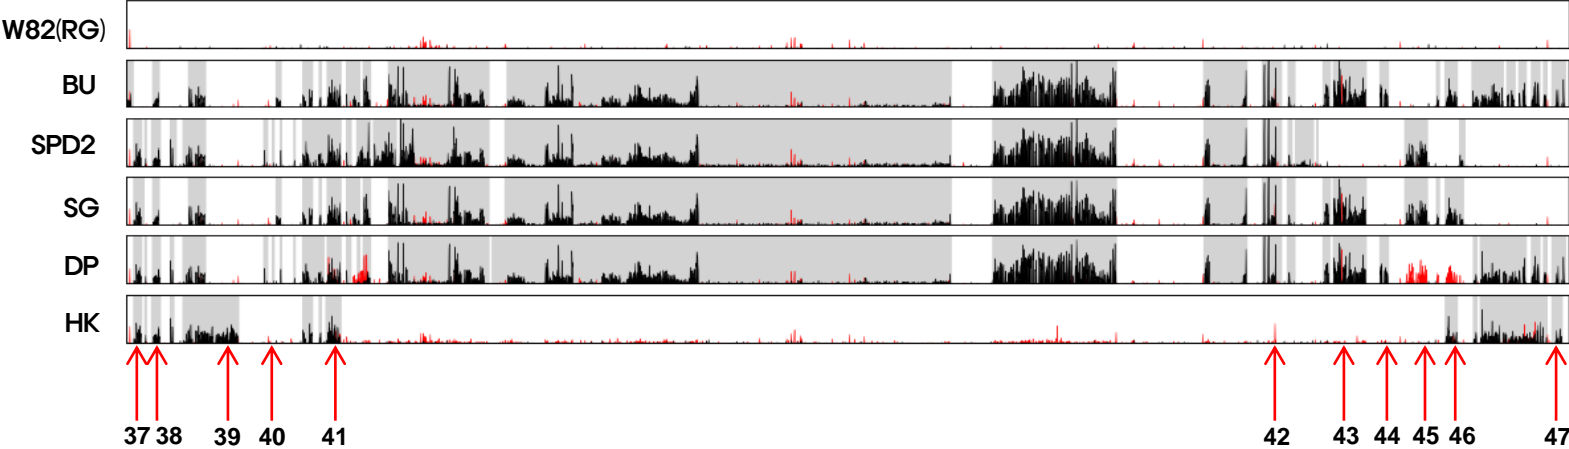

Figure S1. (Continued)

# Gm05

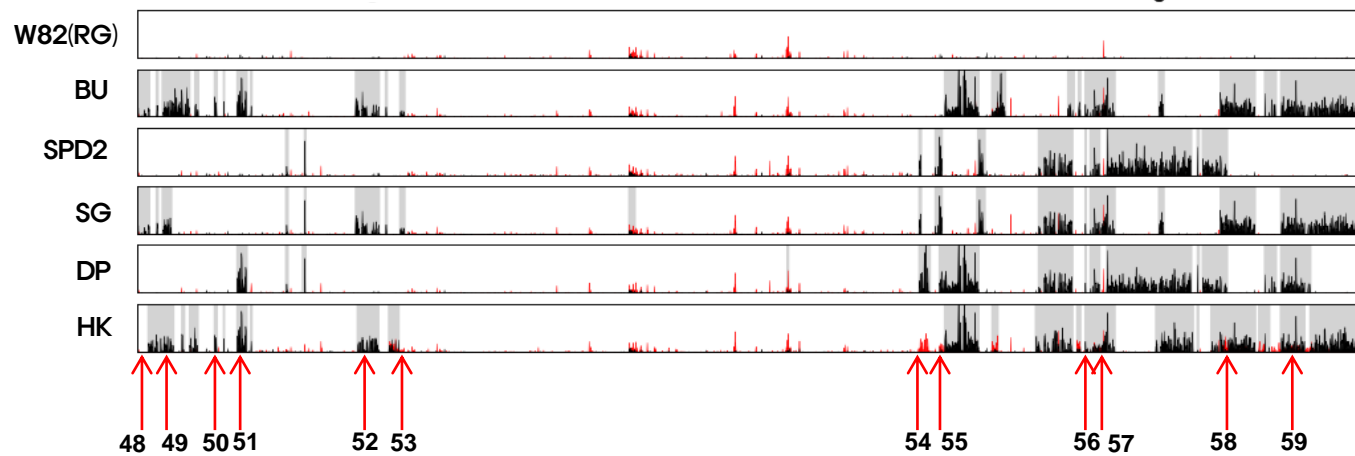

Figure S1. (Continued)

# Gm06

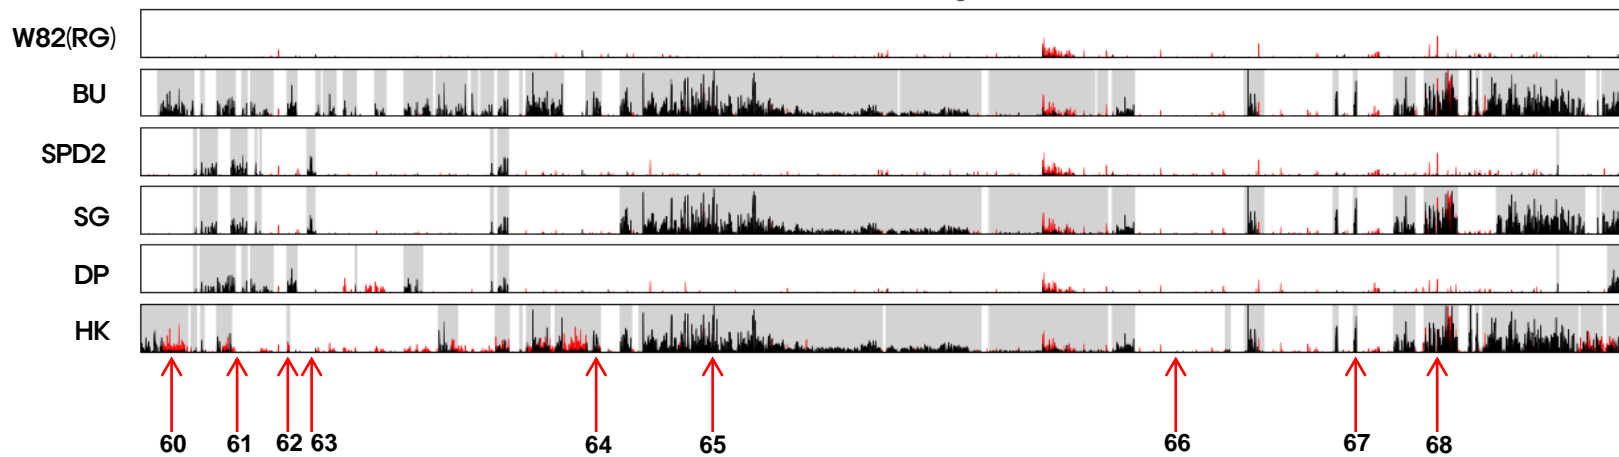

Figure S1. (Continued)

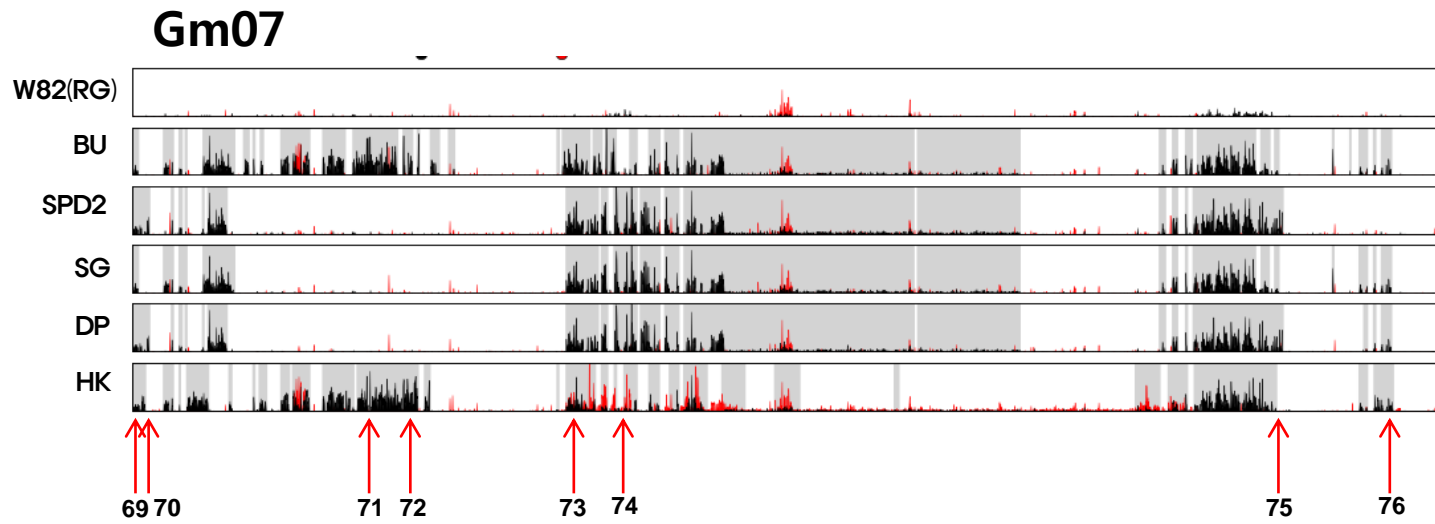

**Figure S1.** (Continued)

# Gm08

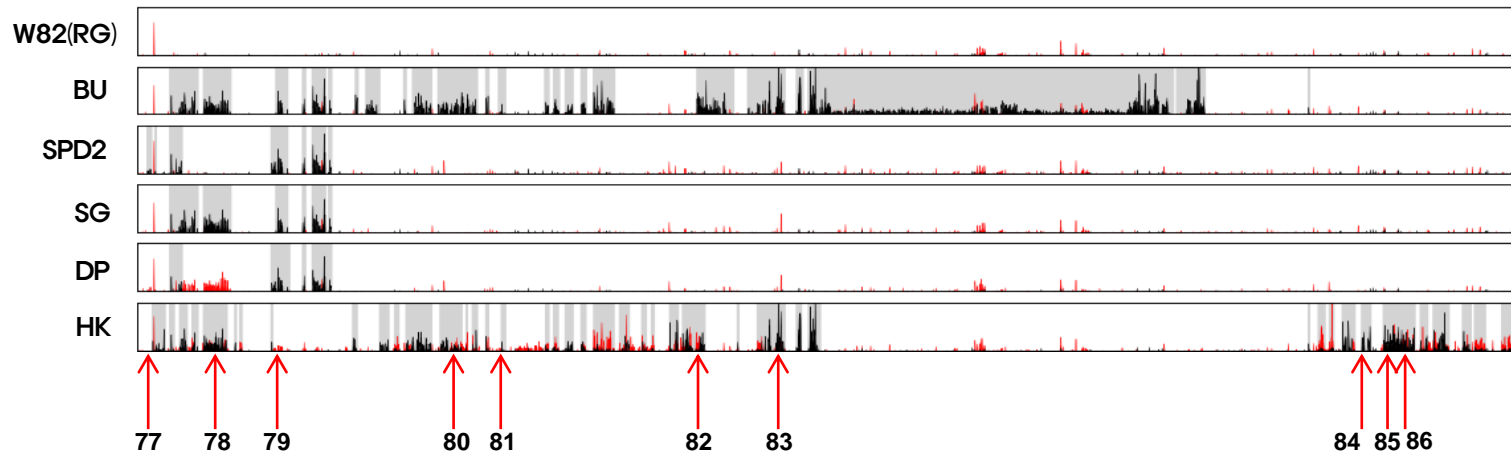

Figure S1. (Continued)



# Gm09

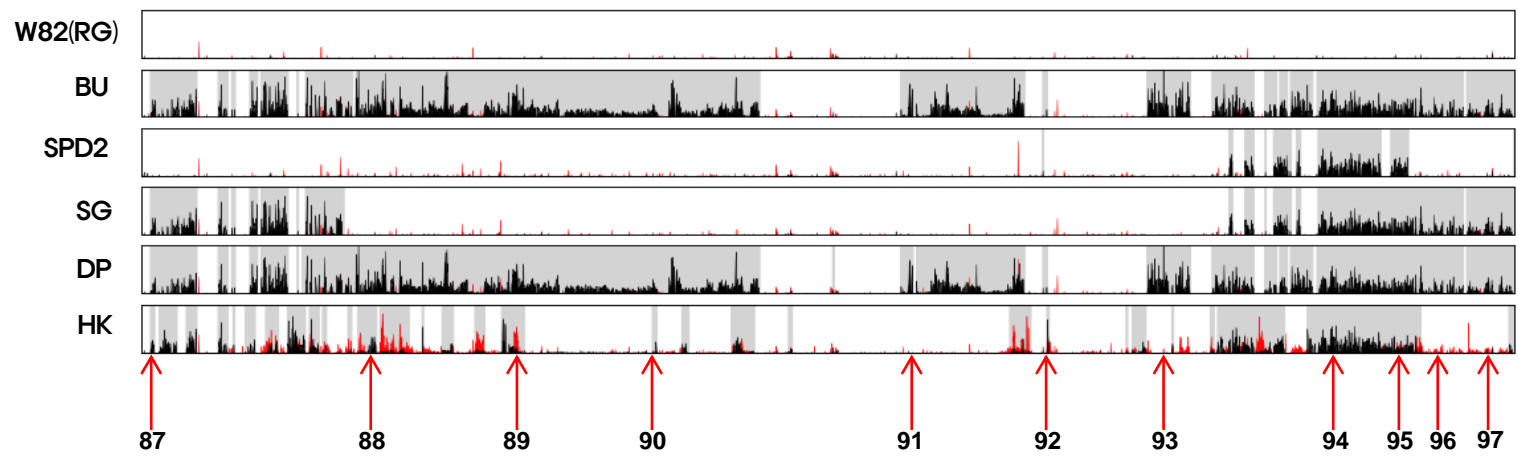

Figure S1. (Continued)

# Gm10

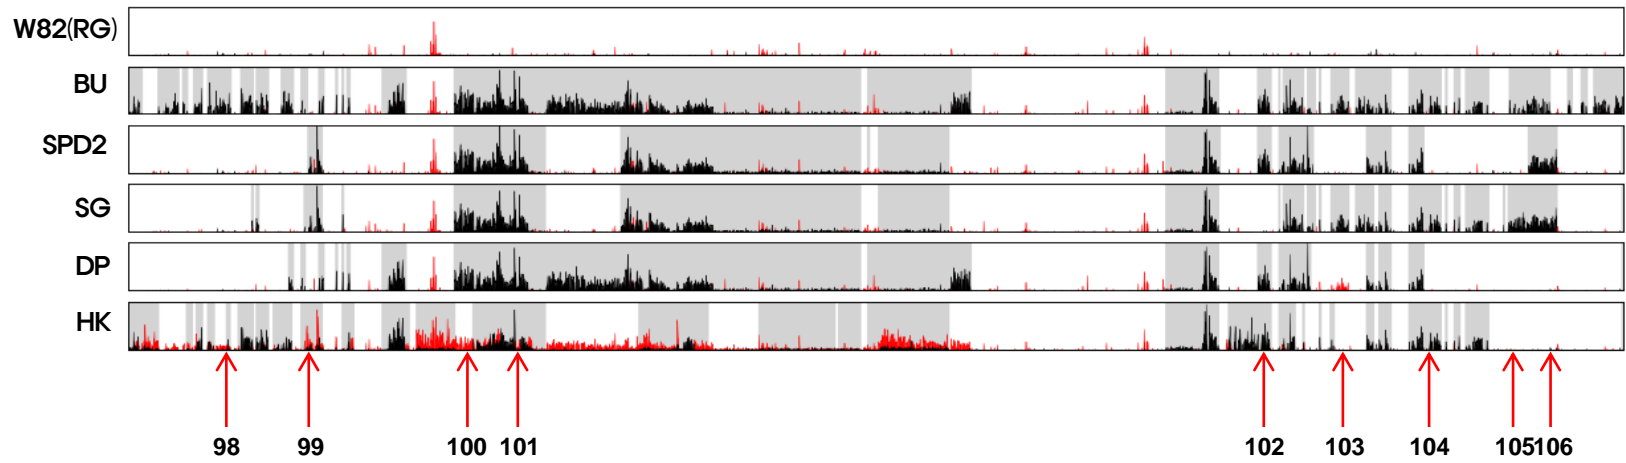

Figure S1. (Continued)

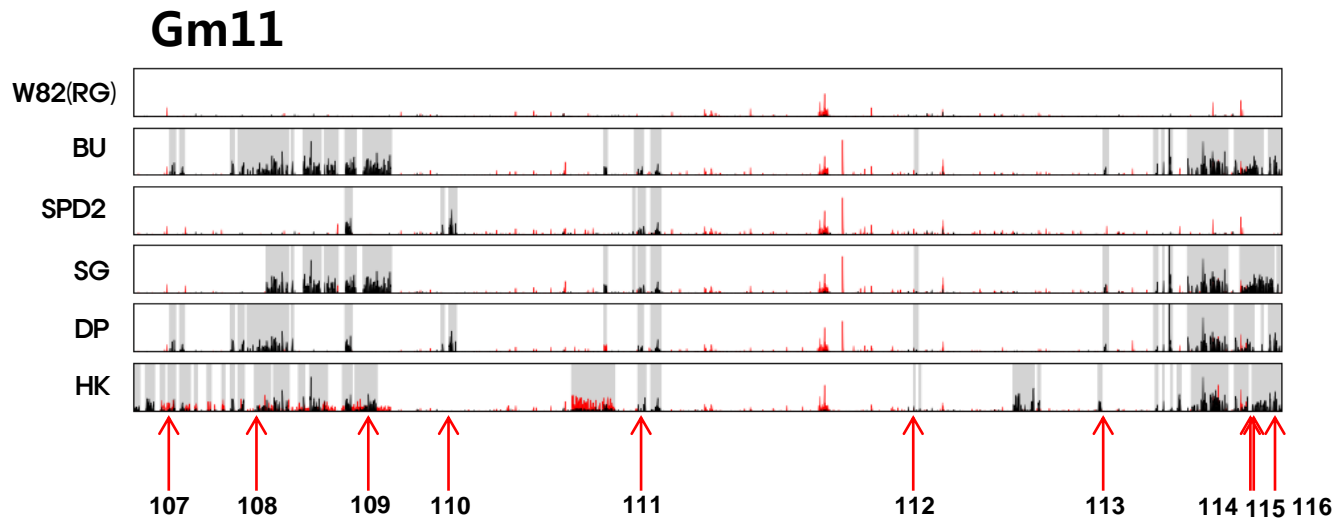

Figure S1. (Continued)

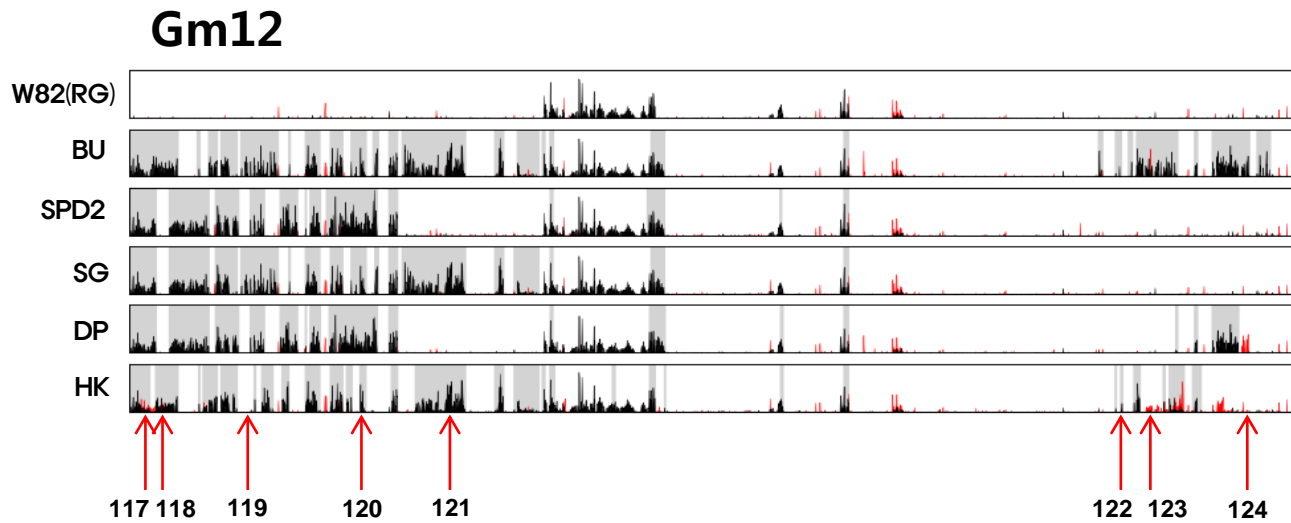

Figure S1. (Continued)

# Gm13

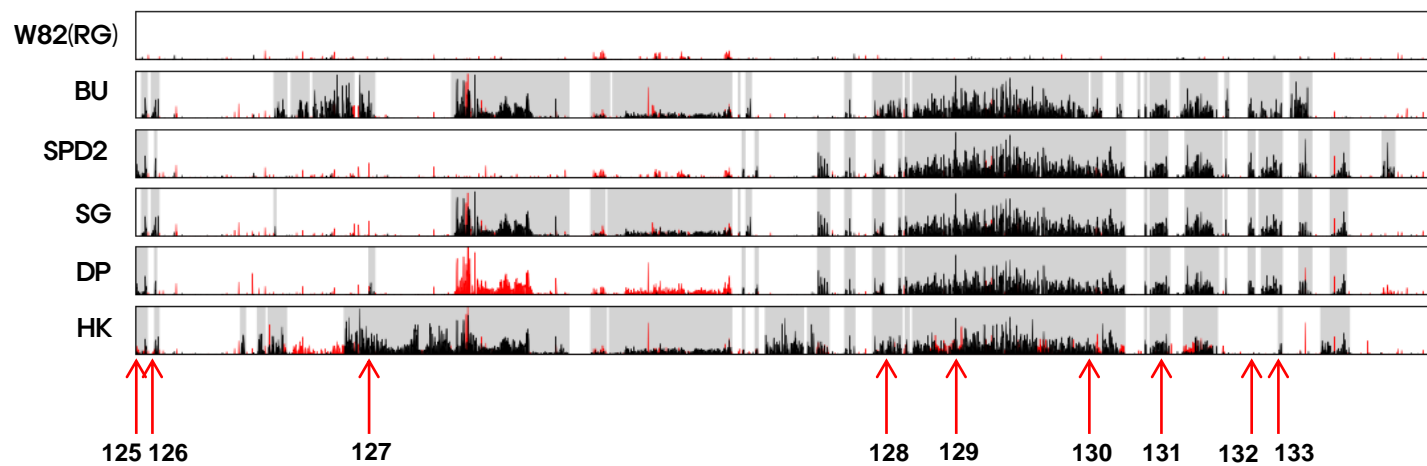

Figure S1. (Continued)

# Gm14

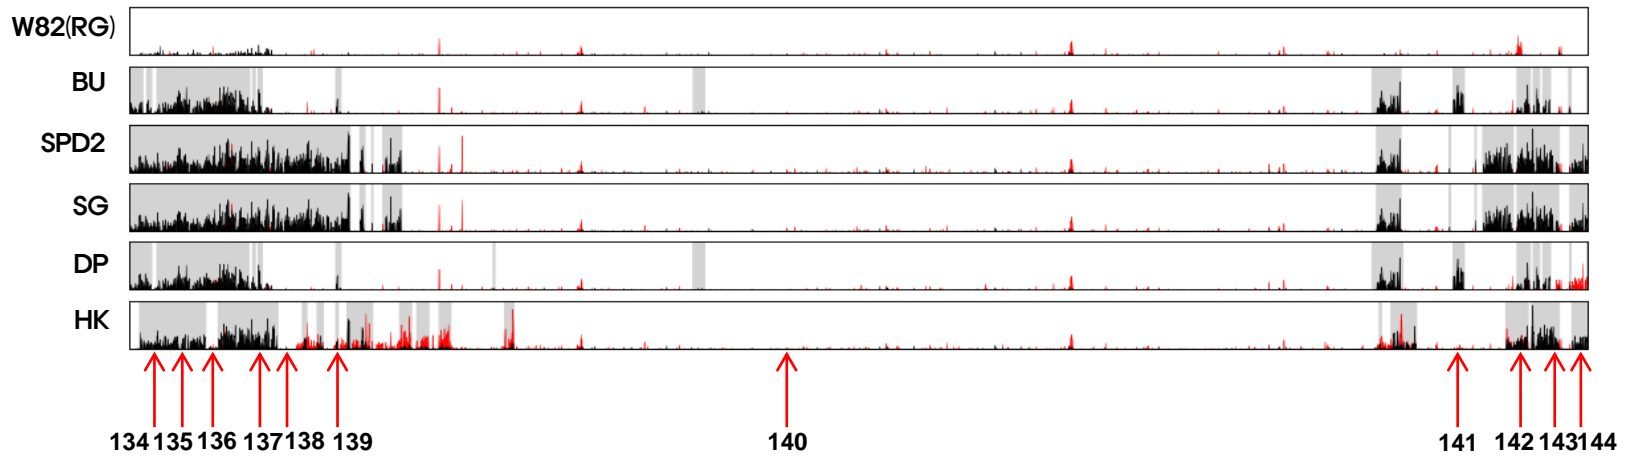

Figure S1. (Continued)

# Gm15

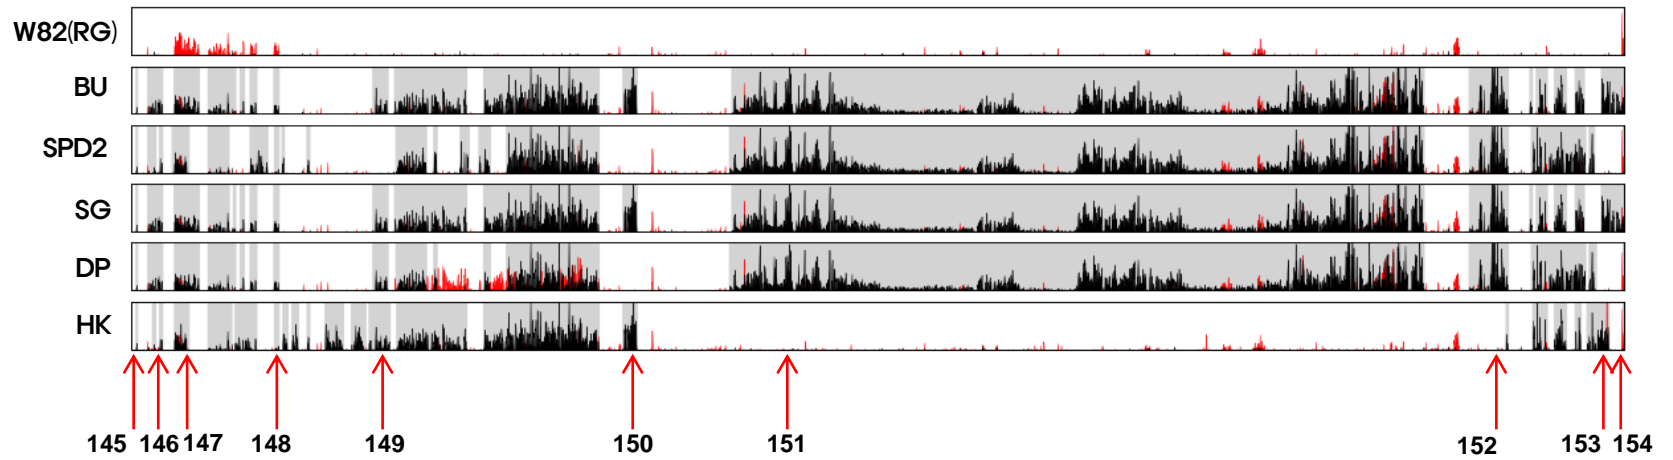

Figure S1. (Continued)

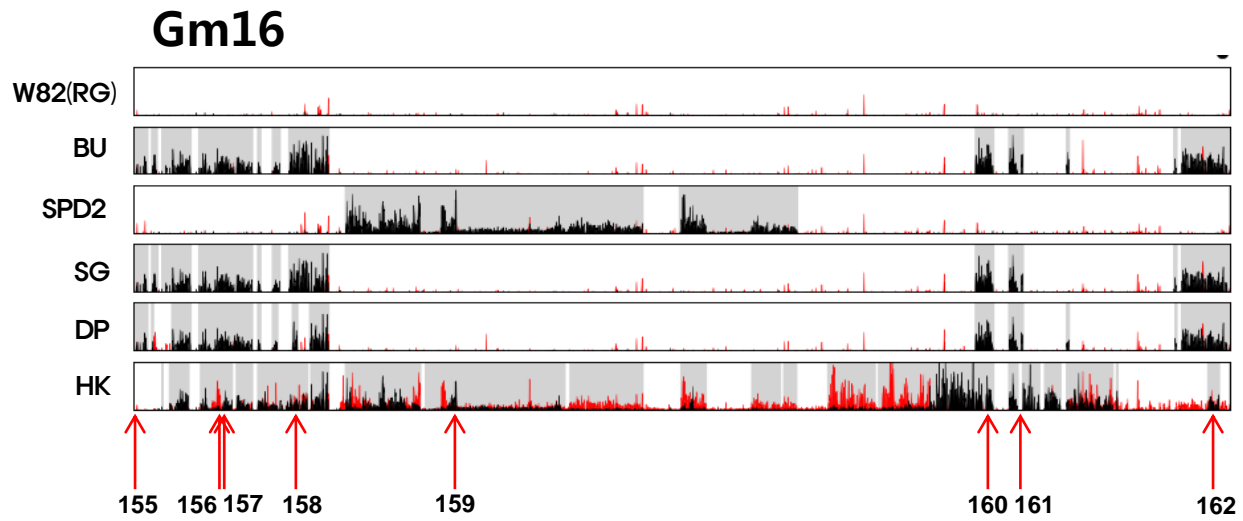

**Figure S1.** (Continued)



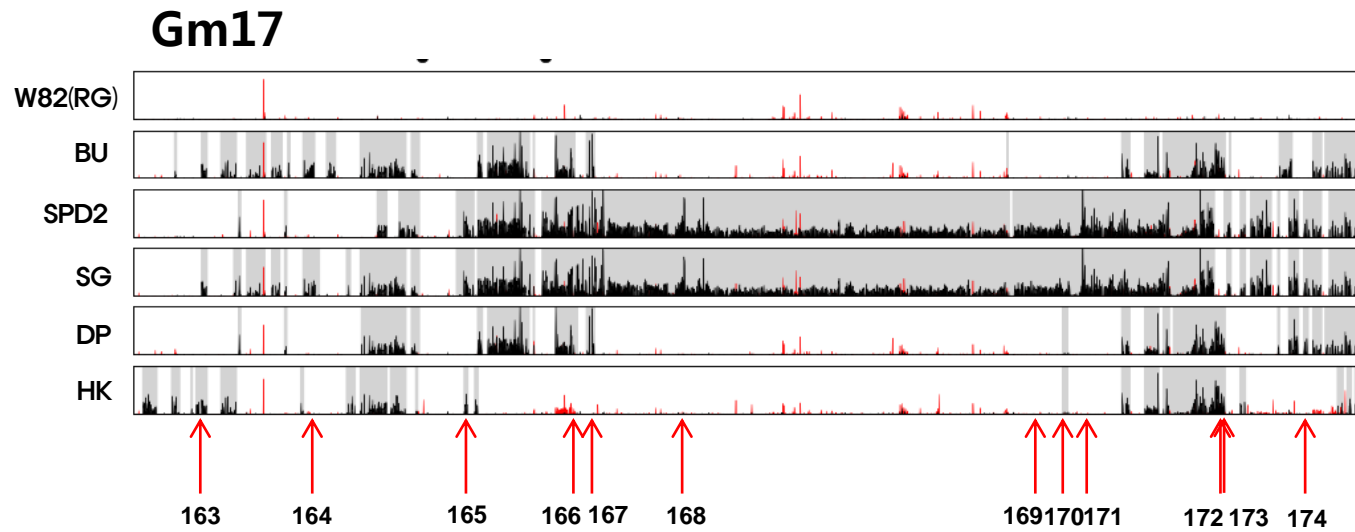

Figure S1. (Continued)

# Gm18

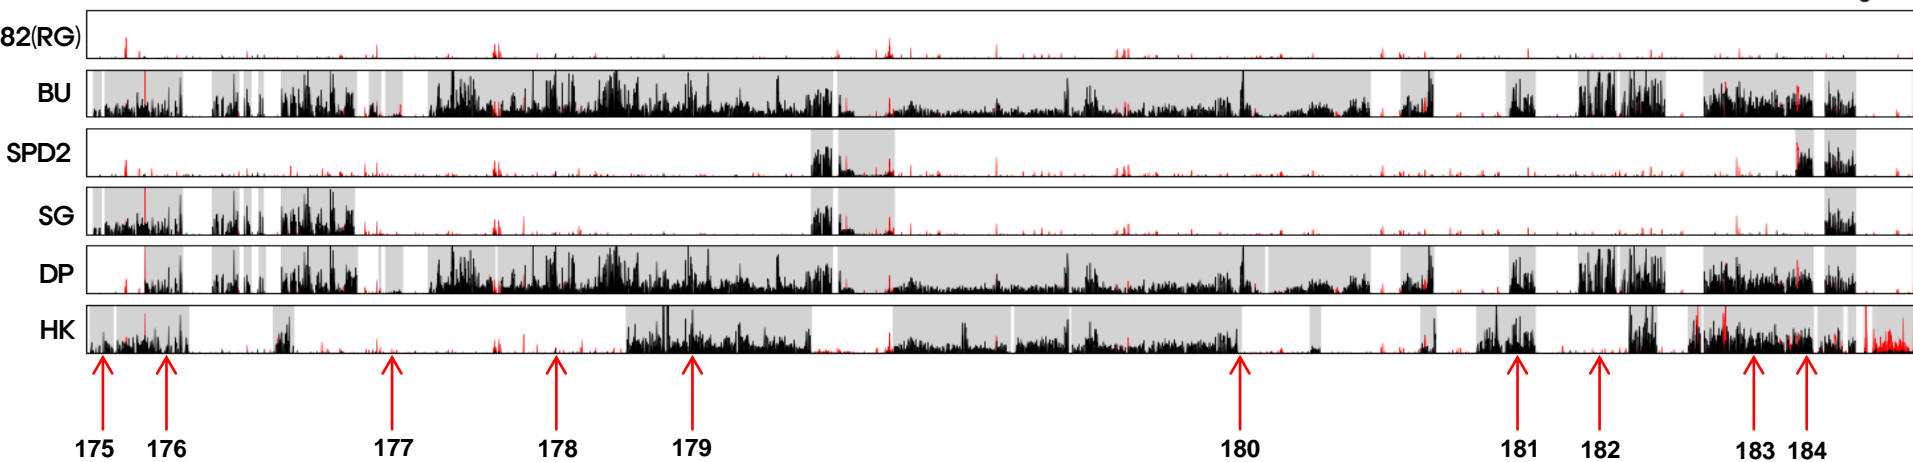

Figure S1. (Continued)

# Gm19

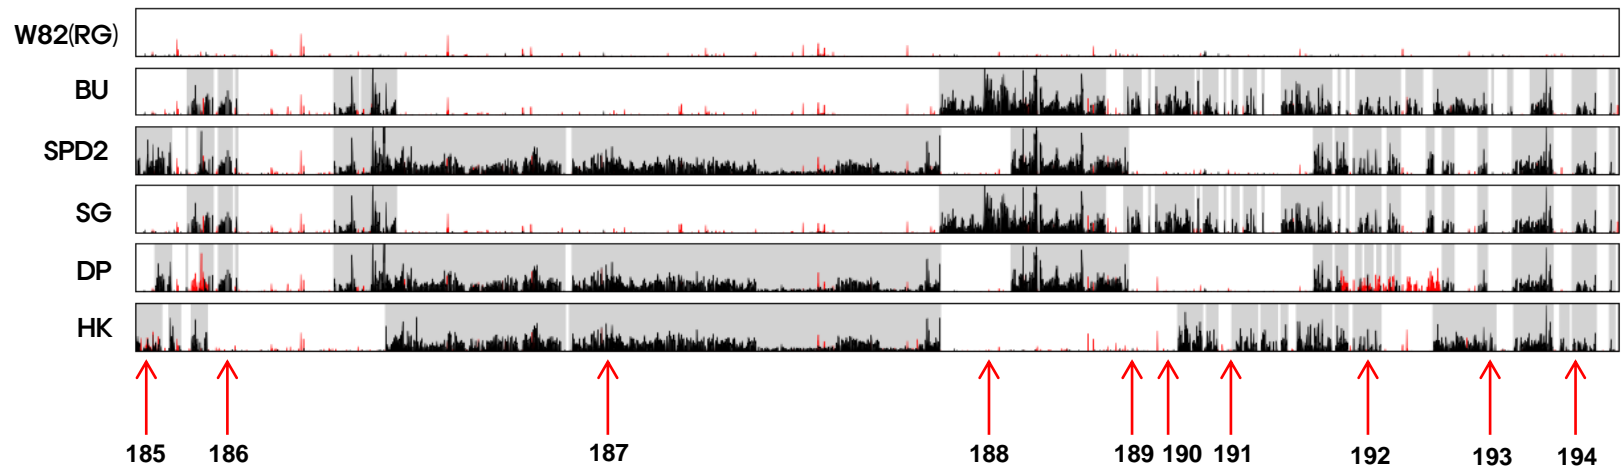

Figure S1. (Continued)

# Gm20

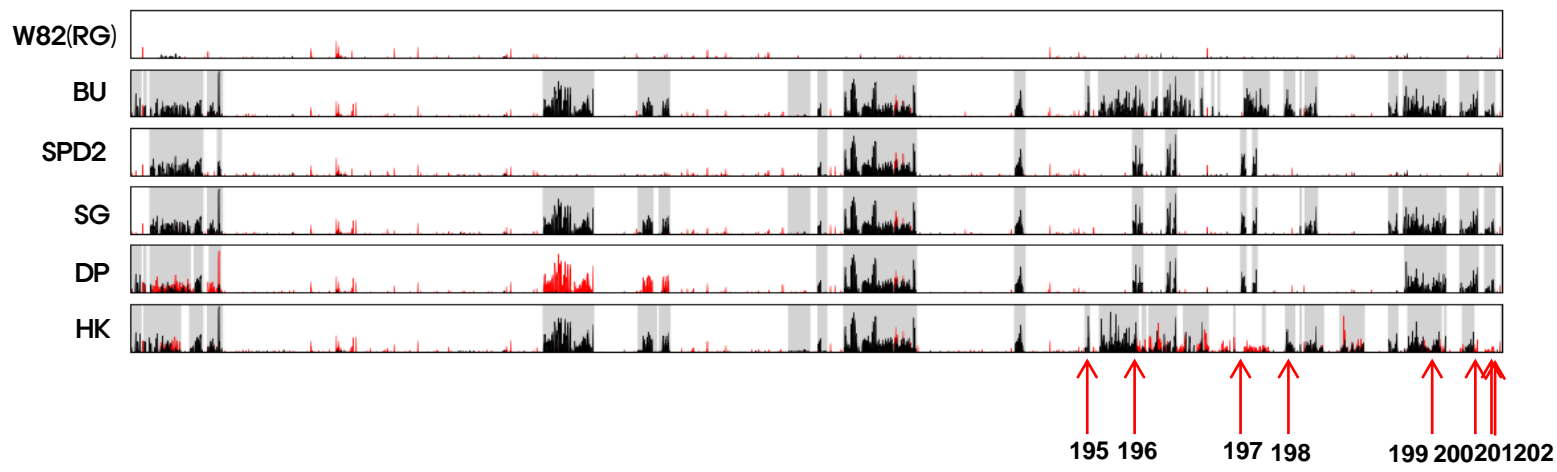

Figure S1. (Continued)
